# Supplementary material for: The noncovalent conjugations of human serum albumin (HSA) with MS/AK and the effect on anti-oxidant capacity as well as anti-glycation activity of Monascus yellow pigments
Source: Royal Society of Chemistry journal article supplement (doi:10.1039/d0fo03025b), 2021-01-01
Supplement: d0fo03025b1.pdf [file d0fo03025b1.pdf]

***Supplementary data for***

The noncovalent conjugations of human serum albumin (HSA) with  
MS/AK and the effect on anti-oxidant capacity as well as anti-  
glycative activity of *Monascus* yellow pigments

Shufen Wu<sup>ab</sup>, Yue Sun<sup>a</sup>, Di Chen<sup>c</sup>, Huanhuan Liu<sup>a</sup>, Zhenjing Li<sup>a</sup>, Mianhua Chen<sup>a</sup>,  
Changlu Wang<sup>a\*</sup>, Lei Cheng<sup>b</sup>, Qingbin Guo<sup>a\*</sup>, Xin Peng<sup>d\*</sup>

<sup>a</sup>State Key Laboratory of Food Nutrition and Safety, College of Food Science and Engineering, Tianjin University of Science and Technology, Tianjin 300457, PR China

<sup>b</sup>Beijing Engineering and Technology Reserch Center of Food Additives, Beijing Technology & Business University (BTBU), Beijing 100048, PR China

<sup>c</sup>College of Food Science and Technology, Henan University of Technology, Zhengzhou, Henan 450001, PR China

<sup>d</sup>School of Life Sciences, Tianjin University, Tianjin 300072, PR China

---

\* Corresponding authors

E-mail address: [pengxin5403@tju.edu.cn](mailto:pengxin5403@tju.edu.cn) (X. Peng).

## 1. Experimental Section

### 1.1 Superoxide anion radical scavenging ability

Superoxide anion was generated by the pyrogalllic acid system and detected on a TU-1900 spectrophotometer (Puxi Analytic Instrument Ltd. of Beijing, China). The system contained 4.5 mL of Tris-HCl buffer (0.1 M, pH8.2), 1.0 mL of ddH<sub>2</sub>O, 0.01 mL of pyrogalllic acid (9 mM) and 1.0 mL of sample solution. The samples of Mps (10, 25, 50 µg/mL) were prepared and added separately into the above reaction mixture. After incubated for 1 h at 25°C, the absorbance was recorded at 320 nm. As a control group, sample solution was substituted with Tris-HCl buffer. The antioxidant activity of each sample was calculated as: *Scavenging rate (%)* =  $[1 - (A_{control,230}/A_{sample,230})] \times 100\%$ .

### 1.2 Hydroxyl radical scavenging activity

Mps solutions (33, 66 and 130 µg/mL) were prepared, and then were incubated with a solution containing phenanthroline (9 mM, 100 µL), phosphate buffer (10 mM, pH 7.4), FeSO<sub>4</sub> (9 mM, 100 µL) and H<sub>2</sub>O<sub>2</sub> (0.1%, 100 µL) at 37°C for 30 min. The absorbance was read at 510 nm. As a control group, sample solution was substituted with distilled water. The antioxidant activity of each sample was calculated as: *Scavenging rate (%)* =  $[1 - (A_{control, 510} - A_{sample, 510})] \times 100\%$ .

### 1.3 ABTS<sup>+</sup>• radical scavenging activity

ABTS solution (7.4 mM, dissolved in deionized water) and 2.6 mM potassium persulfate were prepared, and then mixed to react at 25°C for 16-17h in the dark. The ABTS<sup>+</sup>• solution was diluted in ethanol to an absorbance of 0.7 (± 0.02) at 734 nm before use. 100 µL of Mps (2.5, 5 and 10 µg/mL) and 3 mL of ABTS<sup>+</sup>• solution were mixed and incubated at 25 °C in the dark for 6 min, and the absorbance was read at 734 nm. The antioxidant activity of each sample was calculated as: *Scavenging rate (%)* =  $[1 - (A_{control, 734} - A_{sample, 734})] \times 100\%$ .

### 1.4 Metal chelation ability

Solutions of Mps (50 µL, 0.05, 0.10, 0.30, 0.50, 0.70, 0.90, 1.10 mg/mL) or ethylenediami-netetraacetic acid disodium salt (EDTA-Na<sub>2</sub>) (50 µL) that servrs as positive control, was mixed with ultrapure water (160 µL) and 0.30 mM FeSO<sub>4</sub> solution (20 µL) at 25°C for 5 min. And then 0.8 mM Ferrozine solution (30 µL) was

added to the above mixture. As the sample blanks, the Ferrozine was replaced by ultrapure water. After 15 min, the absorbance was read at 562 nm. The Fe<sup>2+</sup> ion chelating activity was calculated as: Chelating effect (%) =  $[1 - (A_{sample,562} - A_{control,562})] \times 100\%$ .

## 2. Figures

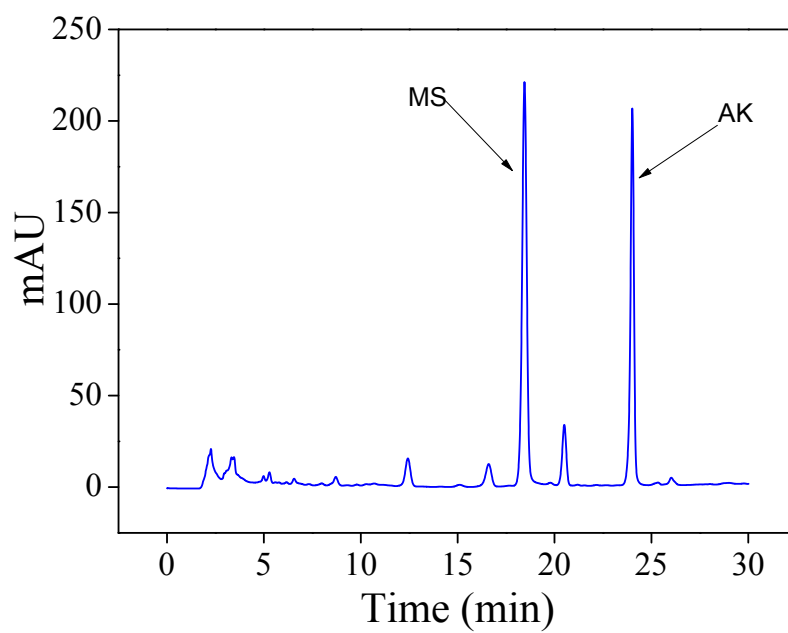

**Fig. S1** HPLC profile of Mps rich in MS and AK [1].

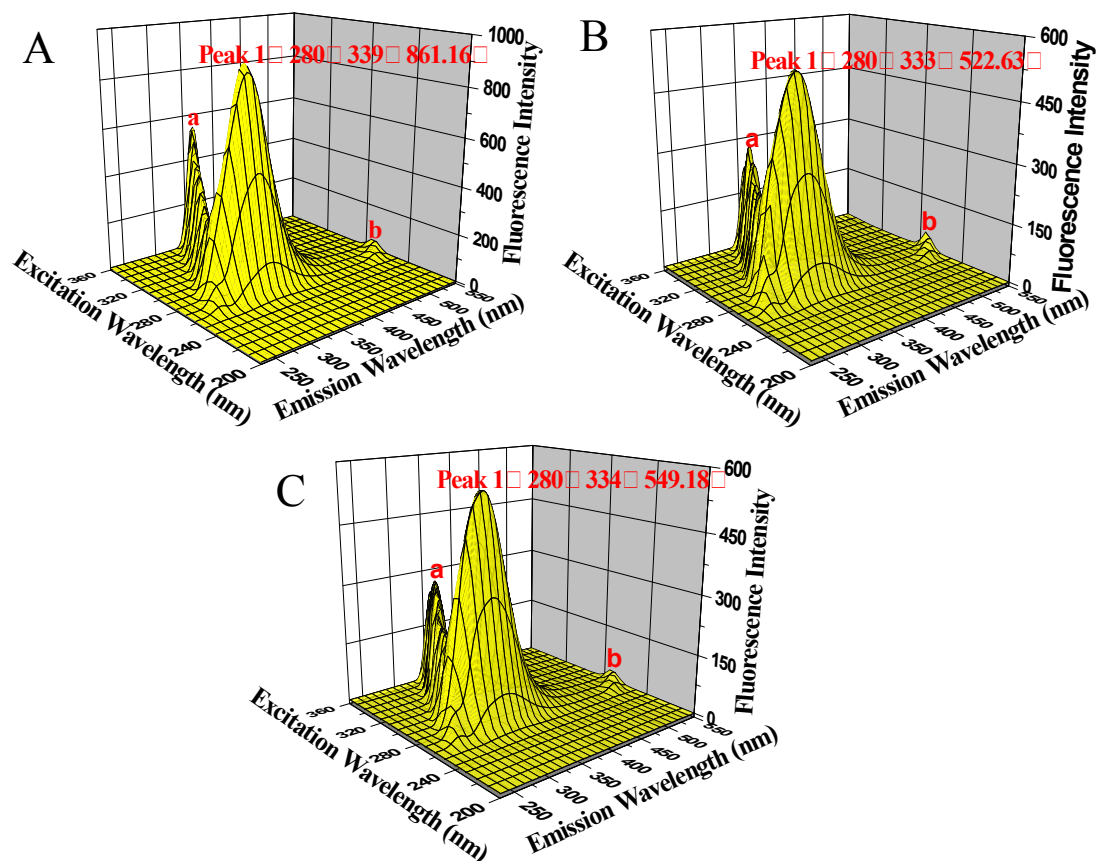

**Fig. S2** Three-dimensional fluorescence spectra of HSA alone (A), MS-HSA system (B), and AK-HSA system (C) at 298 K.

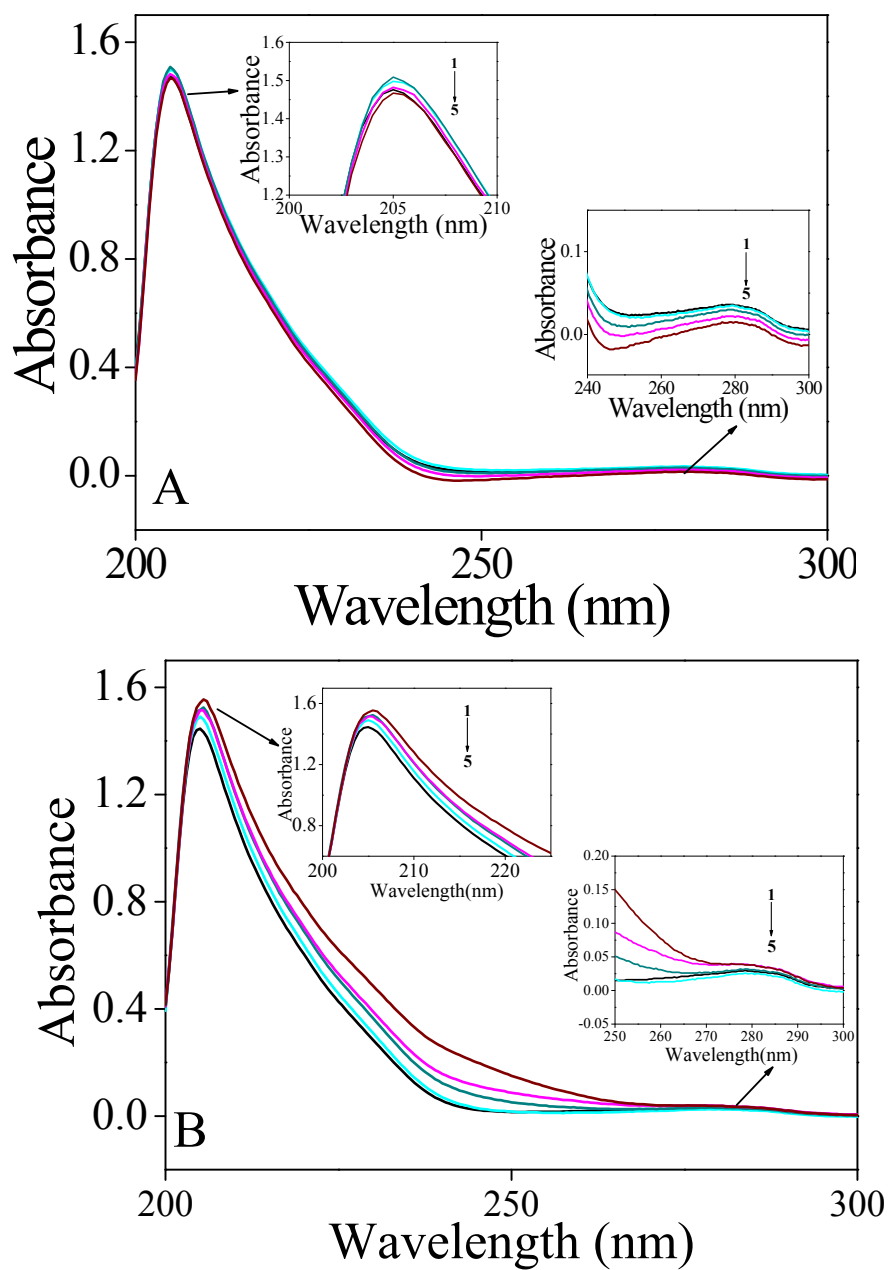

**Fig. S3** UV-vis absorption spectra of MS-HSA system (A) and AK-HSA system (B).  $C_{\text{HSA}} = 1.0 \times 10^{-6}$  M,  $C_{\text{MS}}$  or  $C_{\text{AK}}/(\times 10^{-6}$  M) (1-5): 0, 1.0, 2.0, 3.0, 5.0, respectively, pH = 7.4.

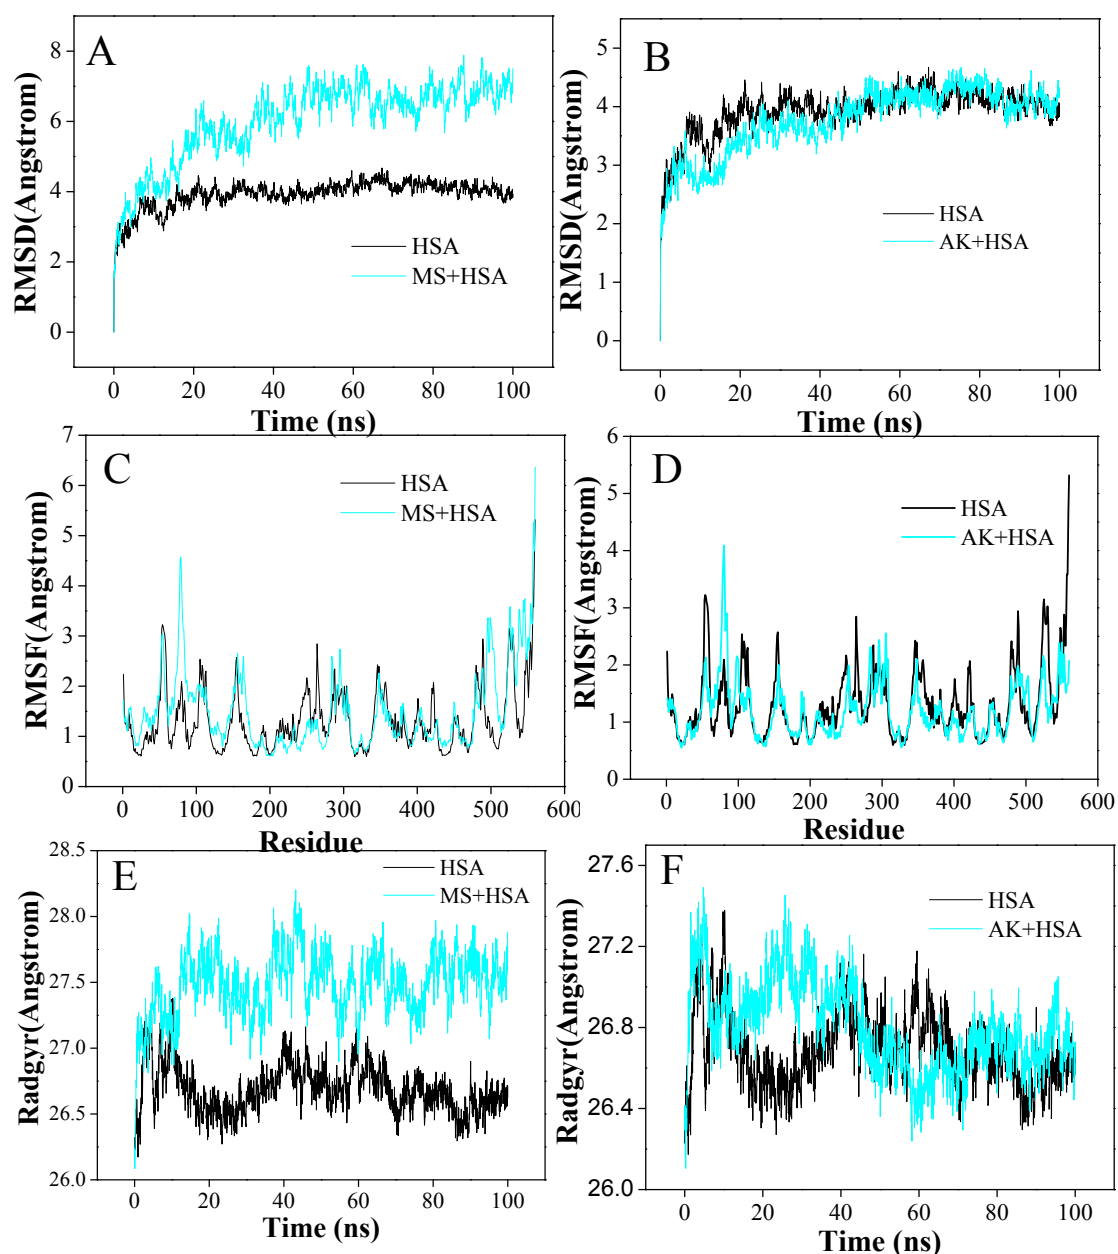

**Fig. S4** Results of molecular simulation. (A) Plot of RMSD values vs simulation time for free HSA and MS-HSA system during a 100 ns MD simulation. (B) Plot of RMSD values vs simulation time for free HSA and AK-HSA system during a 100 ns MD simulation. (C and D) The RMSF values as a function of residue numbers. (E and F) The radius of gyration ( $R_g$ ) of native HSA, MS-HSA system and AK-HSA system as a function of MD simulation time.

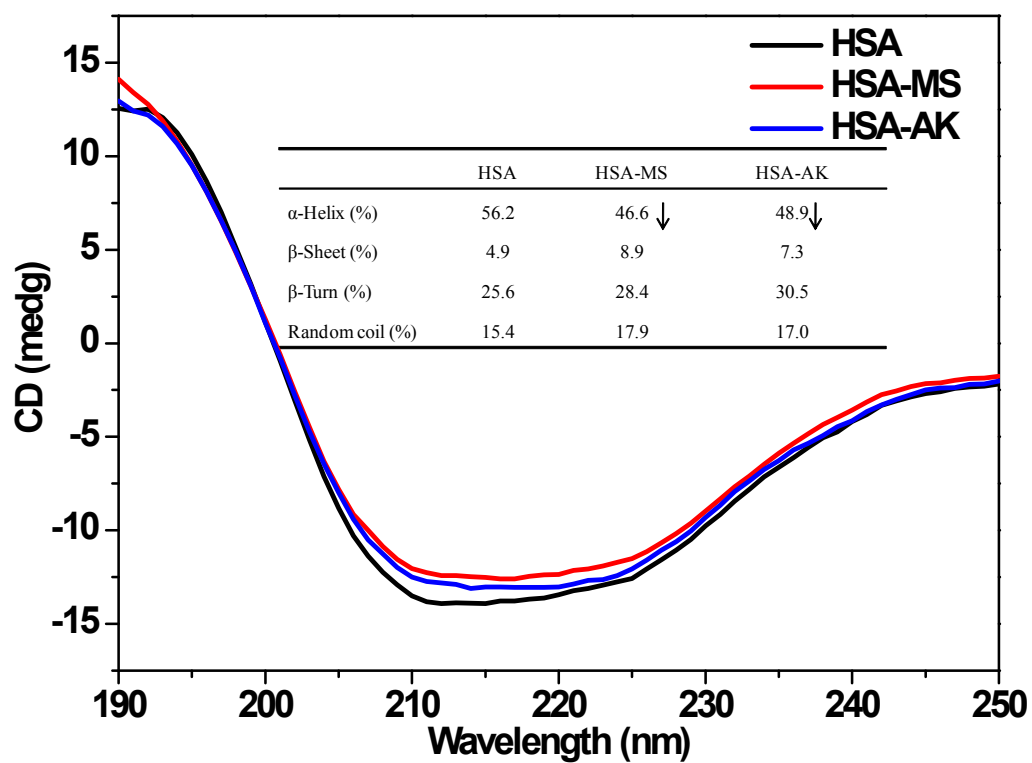

**Fig. S5** Far-UV CD spectra of HSA ( $1.0 \times 10^{-6}$  M) in the absence and presence of MS ( $3.0 \times 10^{-6}$  M) and AK ( $3.0 \times 10^{-6}$  M).



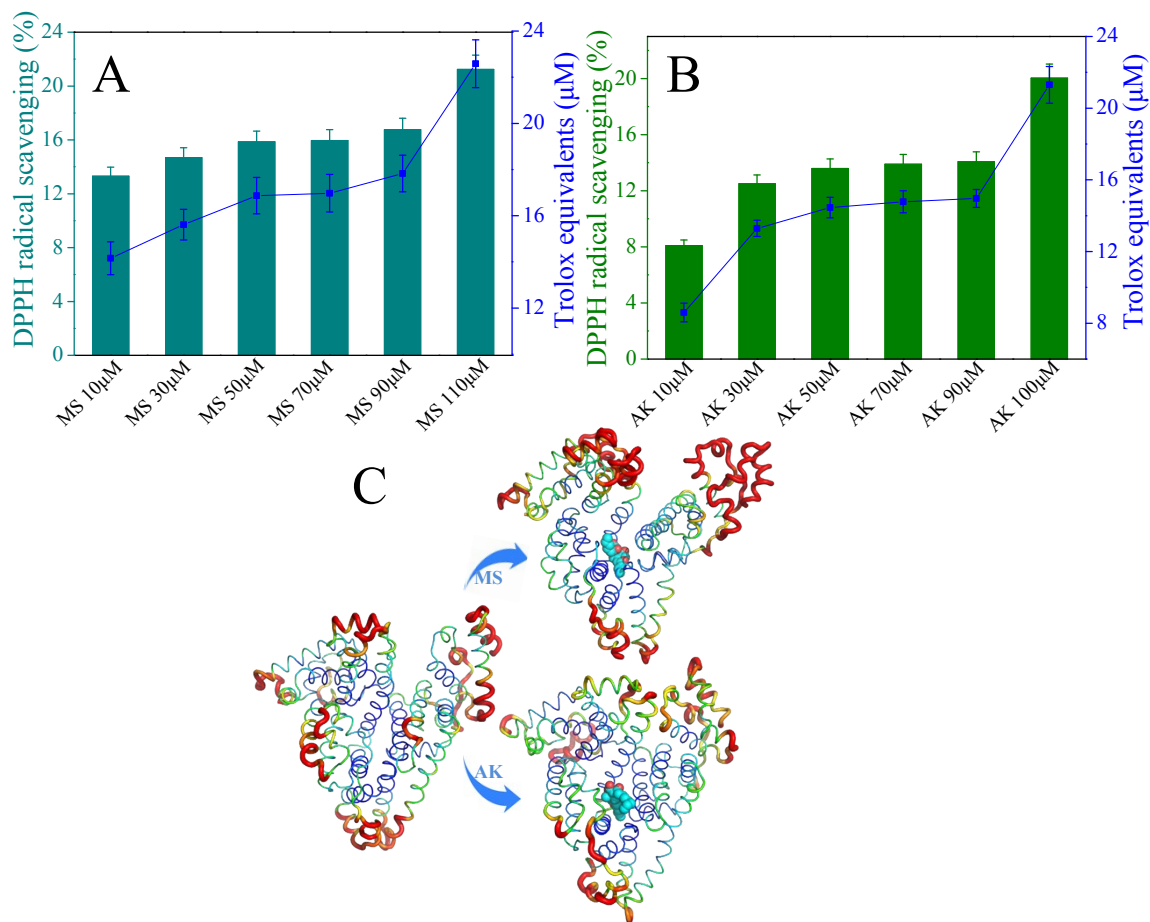

**Fig. S6** DPPH antioxidant activity and the Trolox equivalent antioxidant capacity (TEAC)[2] of different concentrations of MS (A) and AK (B). (C) B-factor putty representation of structures of HSA (free and bounded with MS or AK). Red colors and a wider tube indicate regions with higher B-factors, whereas shades of blue and a narrow tube indicate regions lower B-factors.

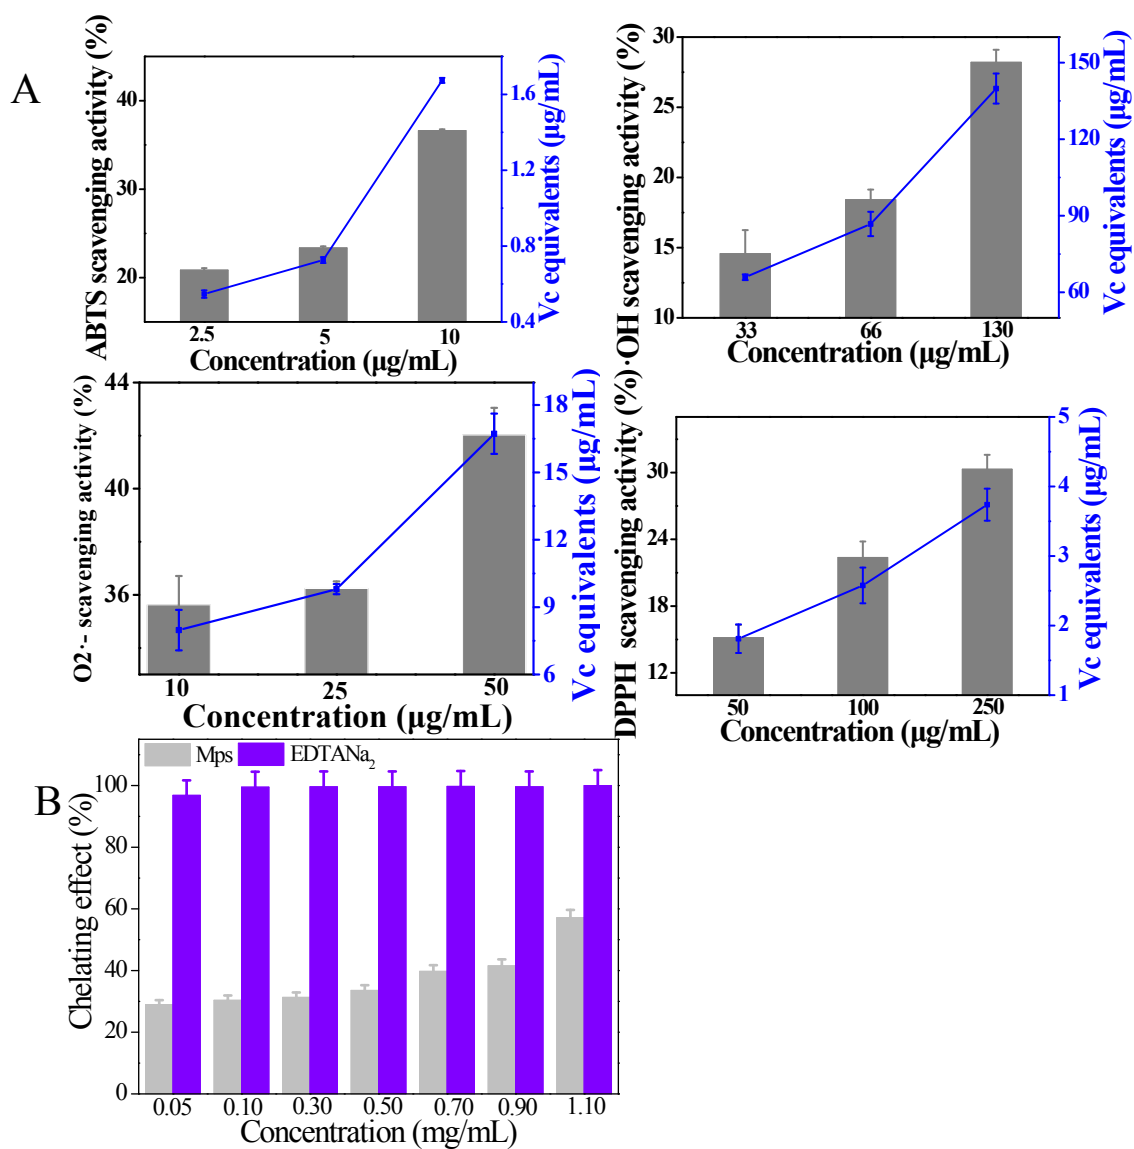

**Fig. S7** (A) The scavenging abilities of Mps on ABTS•+, •OH, O<sub>2</sub>•-, and DPPH• radicals. (B) The effects of Mps on Fe<sup>2+</sup>-chelating capacity.

## References

- [1] D. Chen, C. Xue, M. Chen, S. Wu, Z. Li, C. Wang, Effects of blue light on pigment biosynthesis of *Monascus*, *Journal of Microbiology* 54(4) (2016) 305-310.
- [2] M.J.T.J. Arts, G.R.M.M. Haenen, H.P. Voss, A. Bast, Antioxidant capacity of reaction products limits the applicability of the Trolox Equivalent Antioxidant Capacity (TEAC) assay, *Food and Chemical Toxicology* 42(1) (2004) 45-49.
